# Supplementary material for: Olivo: Formas de conducción para recolección mecánica
Source: Royal Society of Chemistry journal article supplement (doi:10.1039/c3an00957b), 2010-01-01
Supplement: c3an00957b.pdf [file c3an00957b.pdf]

## Supplementary Materials

**Table S1. The ANOVA for special quartic mixture model.**

| Source            | R1    |                       | R2     |                       | R3     |                       | R4     |                       | R5    |                      | R6     |                       |
|-------------------|-------|-----------------------|--------|-----------------------|--------|-----------------------|--------|-----------------------|-------|----------------------|--------|-----------------------|
|                   | F     | P                     | F      | P                     | F      | P                     | F      | P                     | F     | P                    | F      | P                     |
| Model             | 26.71 | 0.0001 <sup>S</sup>   | 64.80  | < 0.0001 <sup>S</sup> | 32.88  | < 0.0001 <sup>S</sup> | 127.38 | < 0.0001 <sup>S</sup> | 19.42 | 0.0004 <sup>S</sup>  | 110.89 | < 0.0001 <sup>S</sup> |
| Linear            | 85.49 | < 0.0001 <sup>S</sup> | 132.57 | < 0.0001 <sup>S</sup> | 103.77 | < 0.0001 <sup>S</sup> | 465.31 | < 0.0001 <sup>S</sup> | 9.58  | 0.0099 <sup>S</sup>  | 203.52 | < 0.0001 <sup>S</sup> |
| AB                | 10.11 | 0.0155 <sup>S</sup>   | 10.37  | 0.0146 <sup>S</sup>   | 18.75  | 0.0034 <sup>S</sup>   | 19.02  | 0.0033 <sup>S</sup>   | 7.12  | 0.0321 <sup>S</sup>  | 61.23  | 0.0001 <sup>S</sup>   |
| AC                | 4.94  | 0.0617 <sup>NS</sup>  | 23.25  | 0.0019 <sup>S</sup>   | 13.78  | 0.0075 <sup>S</sup>   | 24.05  | 0.0017 <sup>S</sup>   | 53.01 | 0.0002 <sup>S</sup>  | 427.64 | < 0.0001 <sup>S</sup> |
| BC                | 10.49 | 0.0143 <sup>S</sup>   | 12.24  | 0.0100 <sup>S</sup>   | 19.22  | 0.0032 <sup>S</sup>   | 19.37  | 0.0032 <sup>S</sup>   | 9.28  | 0.0187 <sup>S</sup>  | 66.07  | < 0.0001 <sup>S</sup> |
| A <sup>2</sup> BC | 3.46  | 0.1052 <sup>NS</sup>  | 26.88  | 0.0013 <sup>S</sup>   | 13.44  | 0.0080 <sup>S</sup>   | 4.15   | 0.0810 <sup>NS</sup>  | 18.75 | 0.0034 <sup>S</sup>  | 90.34  | < 0.0001 <sup>S</sup> |
| AB <sup>2</sup> C | 6.36  | 0.0397 <sup>S</sup>   | 0.091  | 0.7714 <sup>NS</sup>  | 3.24   | 0.1149 <sup>NS</sup>  | 5.71   | 0.0482 <sup>S</sup>   | 1.57  | 0.2506 <sup>NS</sup> | 24.71  | 0.0016 <sup>S</sup>   |
| ABC <sup>2</sup>  | 6.90  | 0.0341 <sup>S</sup>   | 13.84  | 0.0074 <sup>S</sup>   | 4.09   | 0.0829 <sup>NS</sup>  | 3.23   | 0.1155 <sup>NS</sup>  | 0.027 | 0.8733 <sup>NS</sup> | 43.90  | 0.0003 <sup>S</sup>   |
| LOF               | 19.85 | 0.0042 <sup>S</sup>   | 16.48  | 0.0063 <sup>S</sup>   | 155.37 | < 0.0001 <sup>S</sup> | 21.97  | 0.0033 <sup>S</sup>   | 24.58 | 0.0026 <sup>S</sup>  | 6.96   | 0.0359 <sup>S</sup>   |

F: Test statistic, P: *p*-value, LOF: Lack of Fit.

<sup>S</sup> means significant, <sup>NS</sup> means not significant.

**Table S2. The results of complete or reduced special-quartic mixture models fit to six responses.**

| Model term in pseudo-components | Model coefficients estimated from data <sup>a</sup> |        |         |         |         |         |
|---------------------------------|-----------------------------------------------------|--------|---------|---------|---------|---------|
|                                 | R1                                                  | R2     | R3      | R4      | R5      | R6      |
| $z_1$                           | 4.01                                                | 2.04   | 11.22   | 1.55    | 9.10    | 6.12    |
| $z_2$                           | 52.02                                               | 64.47  | 243.64  | 85.80   | 101.07  | 90.77   |
| $z_3^2$                         | 4.37                                                | 2.79   | 12.76   | 2.56    | 9.67    | 6.03    |
| $z_1z_2$                        | -51.90                                              | -67.49 | -264.59 | -93.86  | -97.81  | -93.60  |
| $z_1z_3$                        | 0.35                                                | -0.98  | -2.21   | 1.03    | -2.60   | -2.41   |
| $z_2z_3$                        | -53.03                                              | -73.53 | -268.68 | -95.02  | -112.02 | -97.53  |
| $z_1^2z_2z_3$                   | 24.31                                               | -87.00 | 179.39  | 35.11   | 127.13  | 91.04   |
| $z_1z_2^2z_3$                   | -291.61                                             | 44.83  | -779.22 | -364.42 | -325.30 | -421.24 |
| $z_1z_2z_3^2$                   | 36.62                                               | 66.60  | 105.52  | 33.03   | -5.18   | 67.70   |
| Summary statistics              |                                                     |        |         |         |         |         |
| R-Squared                       | 0.9683                                              | 0.9368 | 0.9741  | 0.9932  | 0.9569  | 0.9922  |
| Adj R-Squared                   | 0.9320                                              | 0.9714 | 0.9444  | 0.9854  | 0.9076  | 0.9832  |
| Pred R-Squared                  | 0.8561                                              | 0.9368 | 0.8680  | 0.9156  | 0.8882  | 0.8997  |

<sup>a</sup> Coefficient was statistically significant with at least 95% confidence.

**Table S3. The constraints and results of numerical optimization with desirability function.**

| Parameter    | Goal     | Experimental region |       | Weight |       | Importance | Solutions    |        |       |        |        |
|--------------|----------|---------------------|-------|--------|-------|------------|--------------|--------|-------|--------|--------|
|              |          | Lower               | Upper | Lower  | Upper |            | 1            | 2      | 3     | 4      | 5      |
| Water        | In range | 93.5                | 97.9  | 1      | 1     | 3          | <b>93.9</b>  | 95.568 | 95.7  | 97.171 | 97.513 |
| Oil          | In range | 0.1                 | 0.5   | 1      | 1     | 3          | <b>0.1</b>   | 0.5    | 0.3   | 0.5    | 0.1    |
| Surfactant   | In range | 2                   | 6     | 1      | 1     | 3          | <b>6</b>     | 3.932  | 4     | 2.329  | 2.387  |
| R1           | Maximize | 3.98                | 4.40  | 1      | 1     | 5          | <b>4.36</b>  | 4.29   | 4.32  | 4.11   | 4.07   |
| R2           | Maximize | 1.50                | 2.67  | 1      | 1     | 5          | <b>2.64</b>  | 1.88   | 1.83  | 1.73   | 2.03   |
| R3           | Maximize | 10.42               | 12.49 | 1      | 1     | 5          | <b>12.44</b> | 11.66  | 11.47 | 10.92  | 11.18  |
| R4           | Maximize | 1.24                | 2.56  | 1      | 1     | 5          | <b>2.55</b>  | 2.02   | 2.14  | 1.57   | 1.72   |
| R5           | Maximize | 8.70                | 9.45  | 1      | 1     | 5          | <b>9.40</b>  | 9.05   | 8.89  | 9.59   | 8.94   |
| R6           | Maximize | 5.47                | 6.12  | 1      | 1     | 5          | <b>5.84</b>  | 6.03   | 5.83  | 6.14   | 5.92   |
| Desirability |          |                     |       |        |       |            | <b>0.876</b> | 0.568  | 0.471 | 0.39   | 0.374  |

**Table S4. Q-TOF MS accurate measurements for the six analytes.**

| No. | Proposal ion                             | Experimental<br><i>m/z</i> | Theoretical<br><i>m/z</i> | Diff<br>(ppm) | Elemental<br>composition                        |
|-----|------------------------------------------|----------------------------|---------------------------|---------------|-------------------------------------------------|
| 1   | [M-H] <sup>-</sup>                       | 353.0888                   | 353.0878                  | -2.81         | C <sub>16</sub> H <sub>18</sub> O <sub>9</sub>  |
|     | [M-H-caffeoyl] <sup>-</sup>              | 191.0559                   | 191.0561                  | 1.10          | C <sub>7</sub> H <sub>12</sub> O <sub>6</sub>   |
| 2   | [M-H] <sup>-</sup>                       | 447.0925                   | 447.0933                  | 1.75          | C <sub>21</sub> H <sub>20</sub> O <sub>11</sub> |
|     | [M-H-Glc] <sup>-</sup>                   | 285.0392                   | 285.0405                  | 4.41          | C <sub>15</sub> H <sub>10</sub> O <sub>6</sub>  |
| 3   | [M-H] <sup>-</sup>                       | 515.1209                   | 515.1195                  | -2.71         | C <sub>25</sub> H <sub>24</sub> O <sub>12</sub> |
|     | [M-H-caffeoyl] <sup>-</sup>              | 353.0876                   | 353.0878                  | 0.58          | C <sub>16</sub> H <sub>18</sub> O <sub>9</sub>  |
|     | [M-H-2caffeoyl] <sup>-</sup>             | 191.0557                   | 191.0561                  | 2.14          | C <sub>7</sub> H <sub>12</sub> O <sub>6</sub>   |
|     | [caffeoyl] <sup>-</sup>                  | 179.0341                   | 179.0350                  | 4.90          | C <sub>9</sub> H <sub>8</sub> O <sub>4</sub>    |
| 4   | [M-H] <sup>-</sup>                       | 515.1187                   | 515.1195                  | 1.55          | C <sub>25</sub> H <sub>24</sub> O <sub>12</sub> |
|     | [M-H-caffeoyl] <sup>-</sup>              | 353.0888                   | 353.0878                  | -2.81         | C <sub>16</sub> H <sub>18</sub> O <sub>9</sub>  |
|     | [M-H-2caffeoyl] <sup>-</sup>             | 191.0552                   | 191.0561                  | 4.75          | C <sub>7</sub> H <sub>12</sub> O <sub>6</sub>   |
|     | [caffeoyl] <sup>-</sup>                  | 179.0346                   | 179.0350                  | 2.12          | C <sub>9</sub> H <sub>8</sub> O <sub>4</sub>    |
|     | [caffeoyl-CO <sub>2</sub> ] <sup>-</sup> | 135.0448                   | 135.0452                  | 2.59          | C <sub>8</sub> H <sub>8</sub> O <sub>2</sub>    |
| 5   | [M-H] <sup>-</sup>                       | 269.0458                   | 269.0455                  | -0.94         | C <sub>15</sub> H <sub>9</sub> O <sub>5</sub>   |
|     | RDA fragmentation                        | 151.0034                   | 151.0037                  | 1.86          | C <sub>7</sub> H <sub>4</sub> O <sub>4</sub>    |
|     | RDA fragmentation                        | 117.0343                   | 117.0346                  | 2.44          | C <sub>8</sub> H <sub>6</sub> O                 |
| 6   | [M-H] <sup>-</sup>                       | 283.0661                   | 283.0671                  | 3.42          | C <sub>9</sub> H <sub>16</sub> O <sub>10</sub>  |
|     | [M-H-CH <sub>3</sub> ] <sup>-</sup>      | 268.0435                   | 268.0436                  | 0.35          | C <sub>8</sub> H <sub>13</sub> O <sub>10</sub>  |
|     | [M-H-CH <sub>3</sub> -CO] <sup>-</sup>   | 240.0477                   | 240.0487                  | 4.07          | C <sub>7</sub> H <sub>13</sub> O <sub>9</sub>   |
|     | RDA fragmentation                        | 151.0036                   | 151.0037                  | 0.54          | C <sub>7</sub> H <sub>4</sub> O <sub>4</sub>    |
|     | RDA fragmentation                        | 117.0348                   | 117.0346                  | -1.79         | C <sub>8</sub> H <sub>6</sub> O                 |

1, chlorogenic acid; 2, luteolin-7-O-β-D-glucoside; 3, 3,5-dicaffeoylquinic acid; 4, 4,5-dicaffeoylquinic acid; 5, apigenin; 6, acacetin
